# Supplementary material
Source: PubMed Central journal article supplement (PMC10259175)
Supplement: NIHMS1901924-supplement-Supp1.pdf [file NIHMS1901924-supplement-Supp1.pdf]

**Supplementary Figure 1.** Sample distribution of 16,541 Infinium HumanMethylation450 array samples across 37 tissues sourced from the Gene Expression Omnibus (GEO). These samples were used to develop a multi-tissue correlation network used for trend deviation analysis.

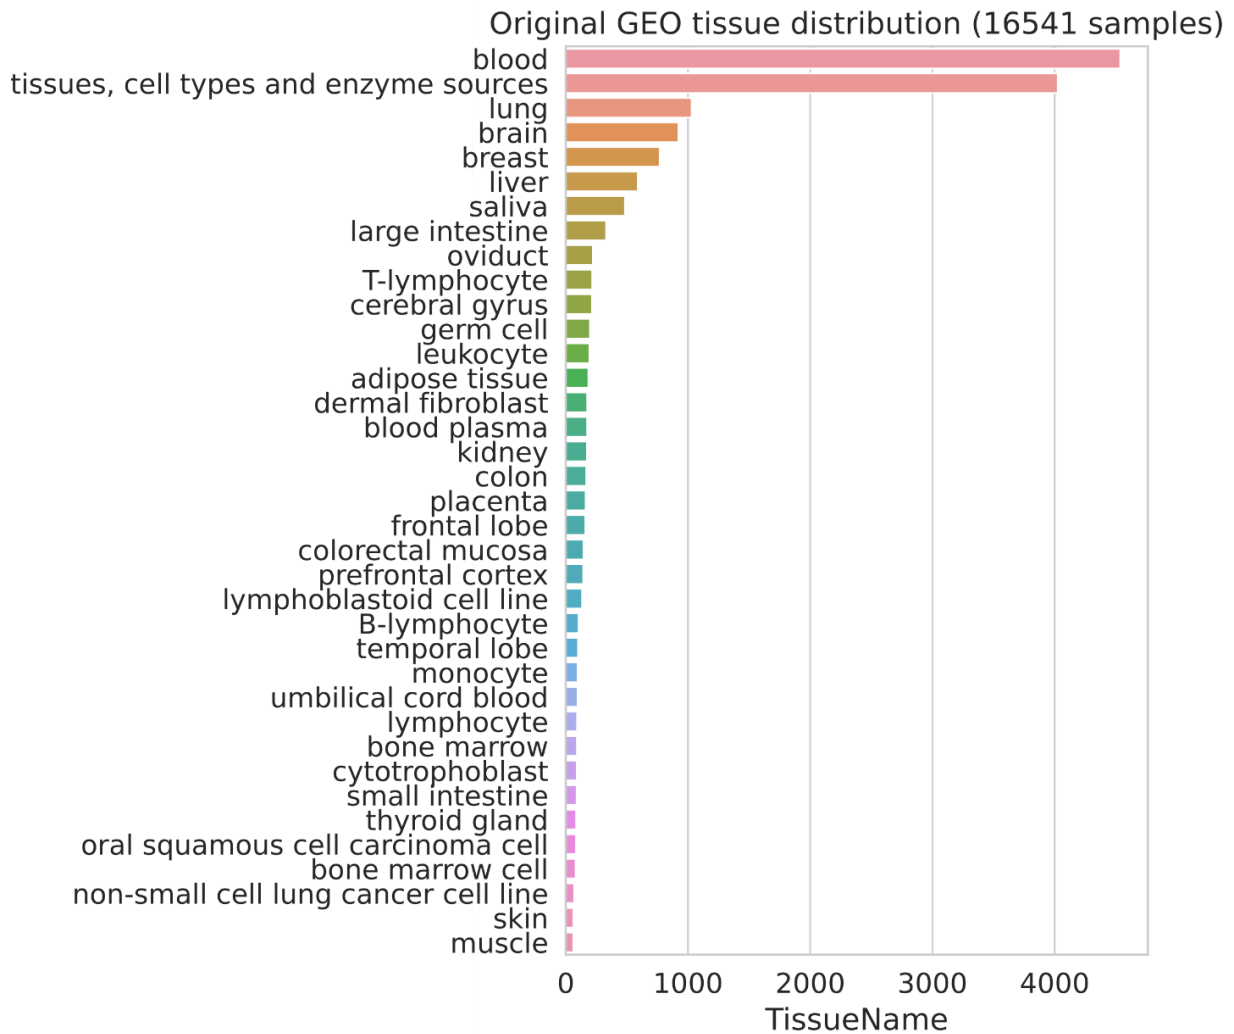

**Supplementary Figure 2.** Literature-based network association analysis reveals relatedness to lupus between 15 out of 74 miR-18a target genes downregulated in lupus CD4+ T cells compared to healthy control. The thickness of the edges is proportional to the number of times the terms were co-mentioned in the literature.

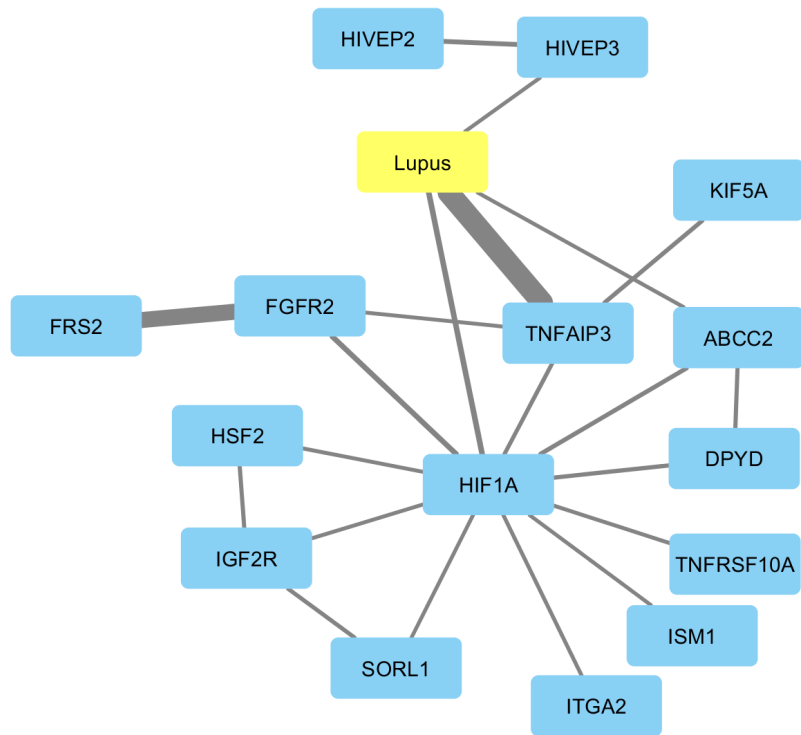

**Supplementary Figure 3. Expression of MIR17HG in kidneys of patients with lupus nephritis derived from the AMP project.**

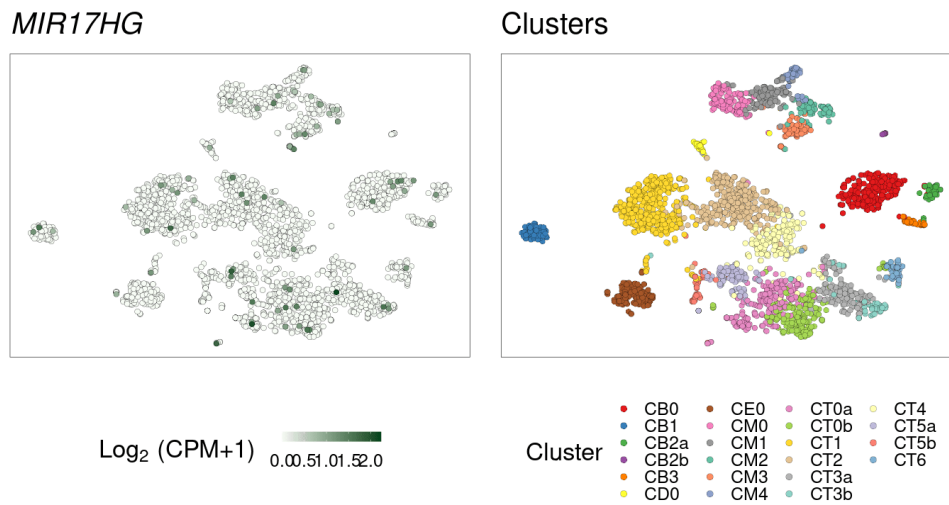

2838 cells, 73 (2.57%) nonzero cells

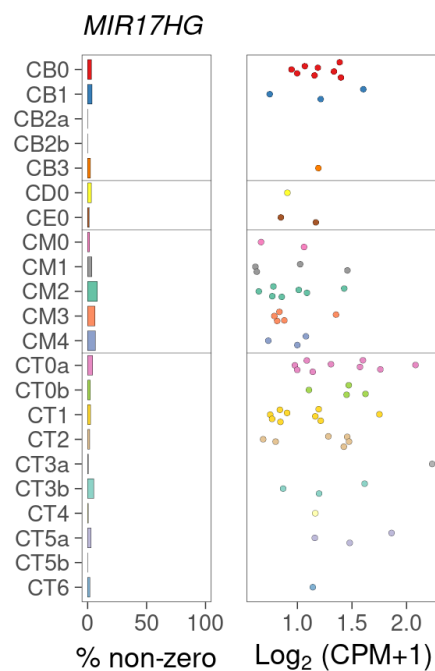

**Cluster annotations:**

**CM0:** CD16+ macrophage, inflammatory; **CM1:** CD16+ macrophage, phagocytic; **CM2:** Tissue-resident macrophage; **CM3:** cDCs; **CM4:** CD16+ macrophage, M2-like;

**CT0a:** Effector memory CD4+ T cells; **CT0b:** Central memory CD4+ T cells; **CT1:** CD56\_dim CD16+ NK cells; **CT2:** CTLs; **CT3a:** Tregs; **CT3b:** TFH-like cells; **CT4:** GZMK+ CD8+ T cells; **CT5a:** Resident memory CD8+ T cells; **CT5b:** CD56\_bright CD16- NK cells; **CT6:** ISG-high CD4+ T cells

**CB0:** Activated B cells; **CB1:** Plasma cells/Plasmablasts; **CB2a:** Naive B cells; **CB2b:** pDCs; **CB3:** ISG-high B cells;

**CD0:** Dividing cells; **CE0:** Epithelial cells
